# Supplementary material for: Heat shock factor 1 directly regulates transsulfuration pathway to promote prostate cancer proliferation and survival
Source: PubMed Central journal article supplement (PMC10764307; doi:10.1038/s42003-023-05727-9), 2024-01-03
Supplement: 42003_2023_5727_MOESM2_ESM.pdf [file 42003_2023_5727_MOESM2_ESM.pdf]

**Supplementary Table 1: HSF1 binding sites in Erythroleukemia Cells after Heat Shock**

| Gene(s)           | Protein | Location in Gene       | -10*<br>log10(pvalue) | Fold<br>Enrichment | False Discovery<br>Rate% |
|-------------------|---------|------------------------|-----------------------|--------------------|--------------------------|
| HSPA1L,<br>HSPA1A | HSP70   | Promoter, Both         | 3044.89               | 25.55              | 0                        |
| HSP90AB1          | HSP90   | Intron                 | 2177.38               | 23.75              | 0                        |
| CBS               | CBS     | Intron, Intron, Intron | 573.09                | 10.99              | 0.45                     |

Promoter: HSF1 binding site in the promotor of gene, Both: HSF1 binding site in the intron/ exon junction of gene, and Intron: HSF1 binding site in the intron of gene.

P value transformation reference:  $-10*\log_{10}(0.05)= 13.01$  and  $-10*\log_{10}(0.0001)= 40.00$

**Supplementary Table 2: Vectors**

| Vector                    | Type                                                                  | Sequence                                                                           |
|---------------------------|-----------------------------------------------------------------------|------------------------------------------------------------------------------------|
| pLKO-Tet-On-shRNA-Control | No template control shRNA                                             | ATCTCGCTTGGGCGAGAGTAAG                                                             |
| pLKO-Tet-On-shHSF1 7480   | HSF1 knockdown a                                                      | GCAGGTTGTTTCATAGTCAGAAC                                                            |
| pLKO-Tet-On-shHSF1 7483   | HSF1 knockdown b                                                      | GCCCAAGTACTTCAAGCACAAC                                                             |
| pLKO-Tet-On-shCBS 45359   | CBS knockdown                                                         | GCGGAACTACATGACCAAGTTC                                                             |
| pCW-Cas9 NTC              | No template control for knockout                                      | GTATTACTGATATTGGTGGG                                                               |
| pCW-Cas9 KN200314G1       | HSF1 knockout 1                                                       | GGTGTCCGGGTCGCTCACGA                                                               |
| pCW-Cas9 KN200314G2       | HSF1 knockout 2                                                       | CGAGGGTCCACAGCTTGGTC                                                               |
| pCW-Cas9 KN401755G1       | CBS knockout 1                                                        | TCTGCCTGGGGGTCTCAGA                                                                |
| pCW-Cas9 KN401755G2       | CBS knockout 2                                                        | GAAGGGGTCCCCAGAGGATA                                                               |
| pLV-U6-(NTC gRNA) 1800    | No template control for steric inhibition                             | GTATTACTGATATTGGTGGG                                                               |
| pLV-U6-9(CBS gRNA 1) 1796 | Steric inhibition of CBS 1 <sup>st</sup> intronic HSF1 binding site 1 | CTTTCTGGAAGATTCGGCGG                                                               |
| pLV-U6-(CBS gRNA 2) 1797  | Steric inhibition of CBS 1 <sup>st</sup> intronic HSF1 binding site 2 | CCGAATCTCCAGAAAGCCG                                                                |
| pLV-U6-(CBS gRNA 4) 1799  | Steric inhibition of CBS 3'UTR HSF1 binding site                      | TATATGAAATGTCCAGAACA                                                               |
| pSTV2.0 GFP               | CBS Overexpression                                                    | CBS ORF NM_000071.3<br>F Primer: GTCGCCGTCTCCGCC<br>R Primer: TTGTGTGATTCCATTTATAT |

Vectors to genetically modify gene expression

**Supplementary Table 3: qPCR and ChIP-qPCR Primers**

| Gene/<br>region                 | F Primer<br>Name | F Primer Sequence 5' | R Primer<br>Name | R Primer Sequence 5'   |
|---------------------------------|------------------|----------------------|------------------|------------------------|
| CBS                             | CBS_F            | TCGTGATGCCAGAGAAGATG | CBS_R            | TTGGGGATTTTCGTTCTTCAG  |
| HSF1                            | HSF1II_F         | GCTGATGAAGGGGAAGCAGG | HSF1II_R         | GACGACTTTCTGTTGCTGGG   |
| ACTB                            | ACTB2_F          | GCCGCCAGCTCACCAT     | ACTB2_R          | AGGAATCCTTCTGACCCATGC  |
| CTH                             | CTH_F            | CCAGCACTCGGGTTTTGAAT | CTH_F            | AACCTGAAGCAAAGGCCAAAC  |
| HSP70<br>Promotor               | HSP70_<br>Prom_F | GGGGTGAGGTTAAGGGTCTC | HSP70_<br>Prom_R | GCTCCCTAATGAATCACCTCTC |
| HSP90<br>1 <sup>st</sup> intron | HSP90_<br>1i_F   | TTCTGTGAGGGAGGGTTGAC | HSP90_<br>1i_R   | CCAGAACAATCTCAGCTCTCG  |
| CBS 1 <sup>st</sup><br>intron   | CBS_<br>1i_F     | GAGGGGCCAAAAGCAAGG   | CBS_<br>1i_F     | GTCACCTACGGGAAGGGACT   |
| CBS 1 <sup>st</sup><br>intron   | CBS_<br>1i_2F    | CCCTTACCTTGCGAGAGAGG | CBS_<br>1i_2R    | GTCACCTACGGGAAGGGACT   |
| CBS<br>3'UTR                    | CBS_<br>3UTR_F   | GCAACTGCTGATCGACTTTG | CBS_<br>3UTR_R   | GTGCTCTGACATGCCTGAAA   |
| CBS<br>3'UTR                    | CBS_<br>3UTR_2F  | ACCCCGTGAAGCAATCATTT | CBS_<br>3UTR_2R  | TGCCTGAAAATACCATGCAA   |

Primers used to assay level of mRNA with qPCR and ChIP-qPCR

Hauck et. al. Supplemental Figures and Legends

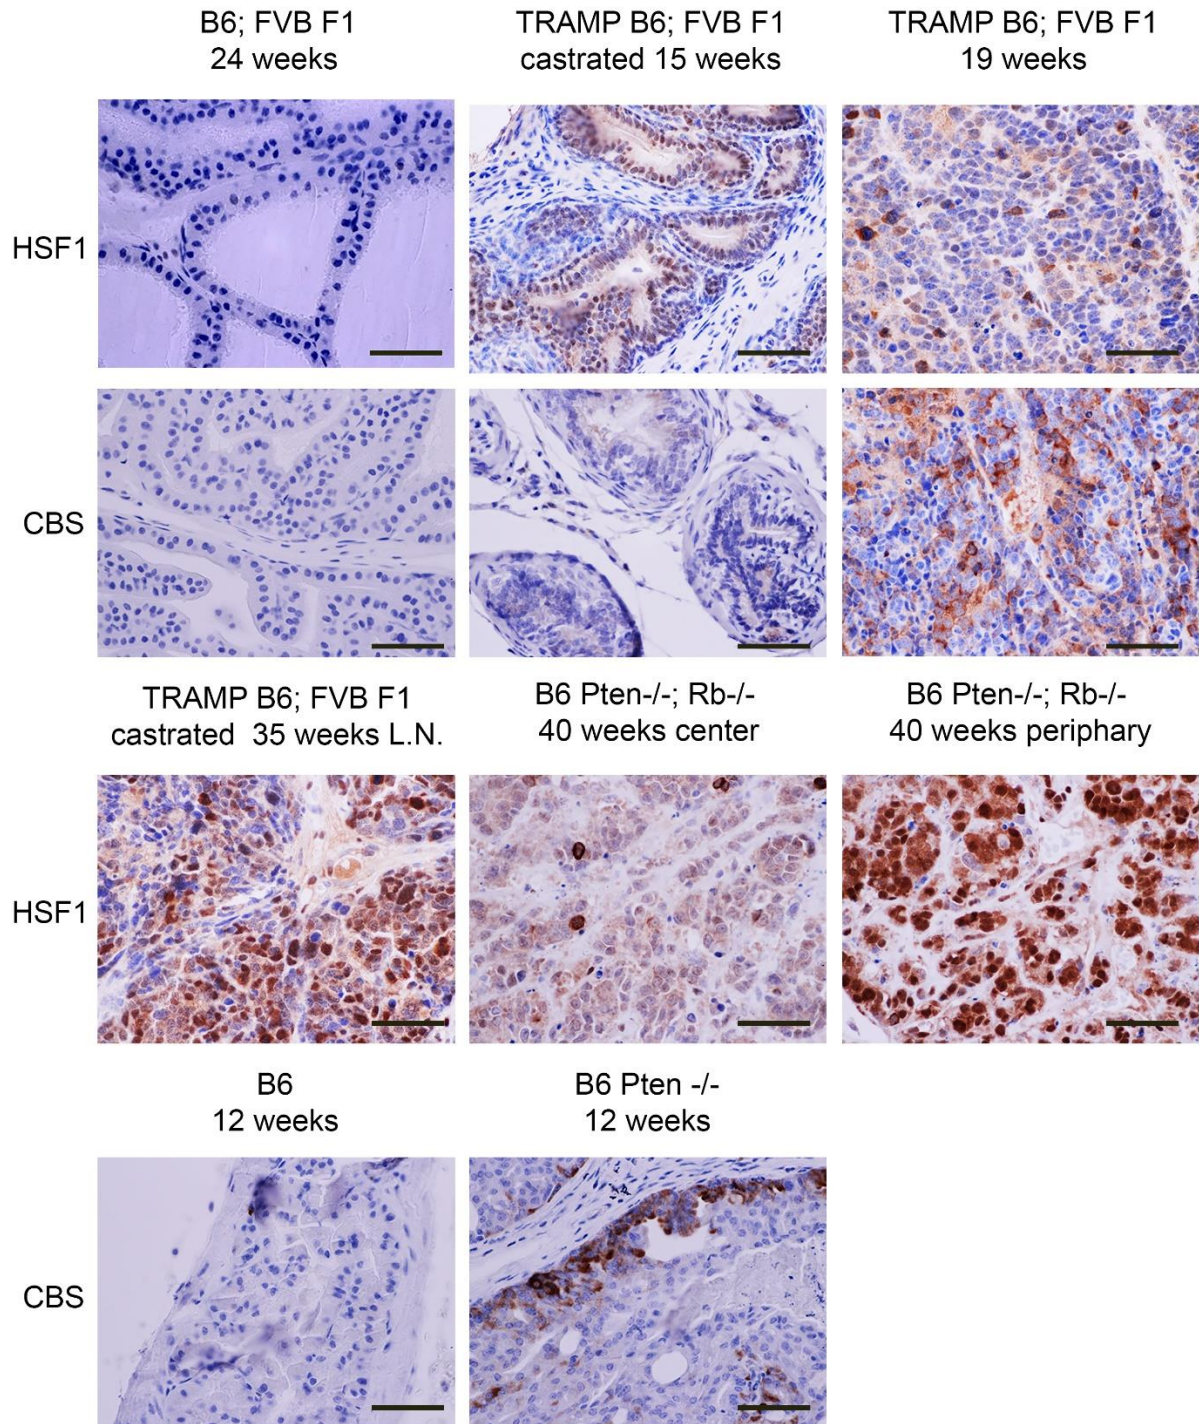

**Supplementary Figure 1 HSF1 and CBS levels are increased in mouse PCa models.** HSF1 and CBS protein levels are increased in TRAMP FVB F1 mice. HSF1 was increased in lymph node metastasis. Pten; Rb1 double knockout mice had higher HSF1 in the periphery of the tumor where there is often more cell proliferation. CBS protein was detected in 12-week-old Pten knockout mice. Scale bar= 50  $\mu$ m. LN: lymph node.

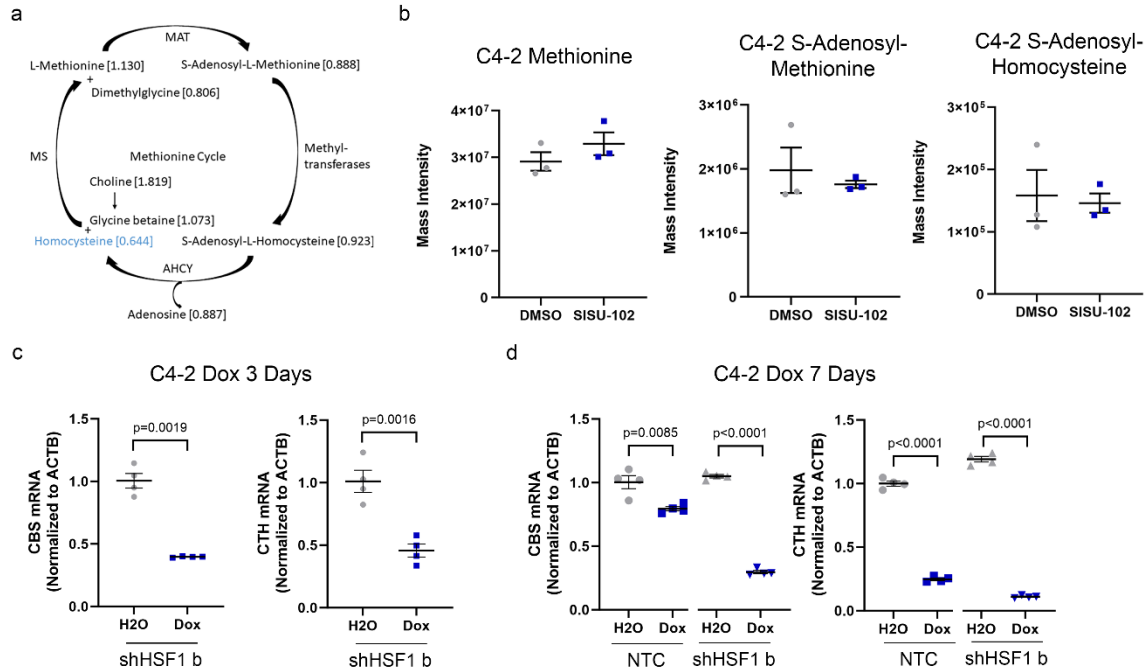

**Supplementary Figure 2 Methionine cycle is unaffected by HSF1 inhibition and CBS is reproducibly decreased by shHSF1 but not CTH.** (a) Methionine cycle metabolites are shown with red indicating a significant increase and blue indicating a significant decrease in metabolite level. (b) SISU-102 treatment of C4-2 cells did not modify the levels of methionine, s-adenosyl-methionine, or s-adenyl-homocysteine (n=3). (c, d) Treatment of C4-2 cells with a different inducible shRNA targeting *HSF1* that was shown in the primary figures with 50 ng per mL doxycycline for 3 days (c) decreased CBS levels, but did not affect CTH levels (n=4 technical replicates). (d) Doxycycline treatment for 7 days decreased CBS only in the shHSF1 cells, but doxycycline treatment decreased CTH levels in both the NTC and shHSF1 cells (n=4 technical replicates). Mean ± standard error is displayed in dot plots and bar graphs. CTH: cystathionine  $\gamma$ -lyase

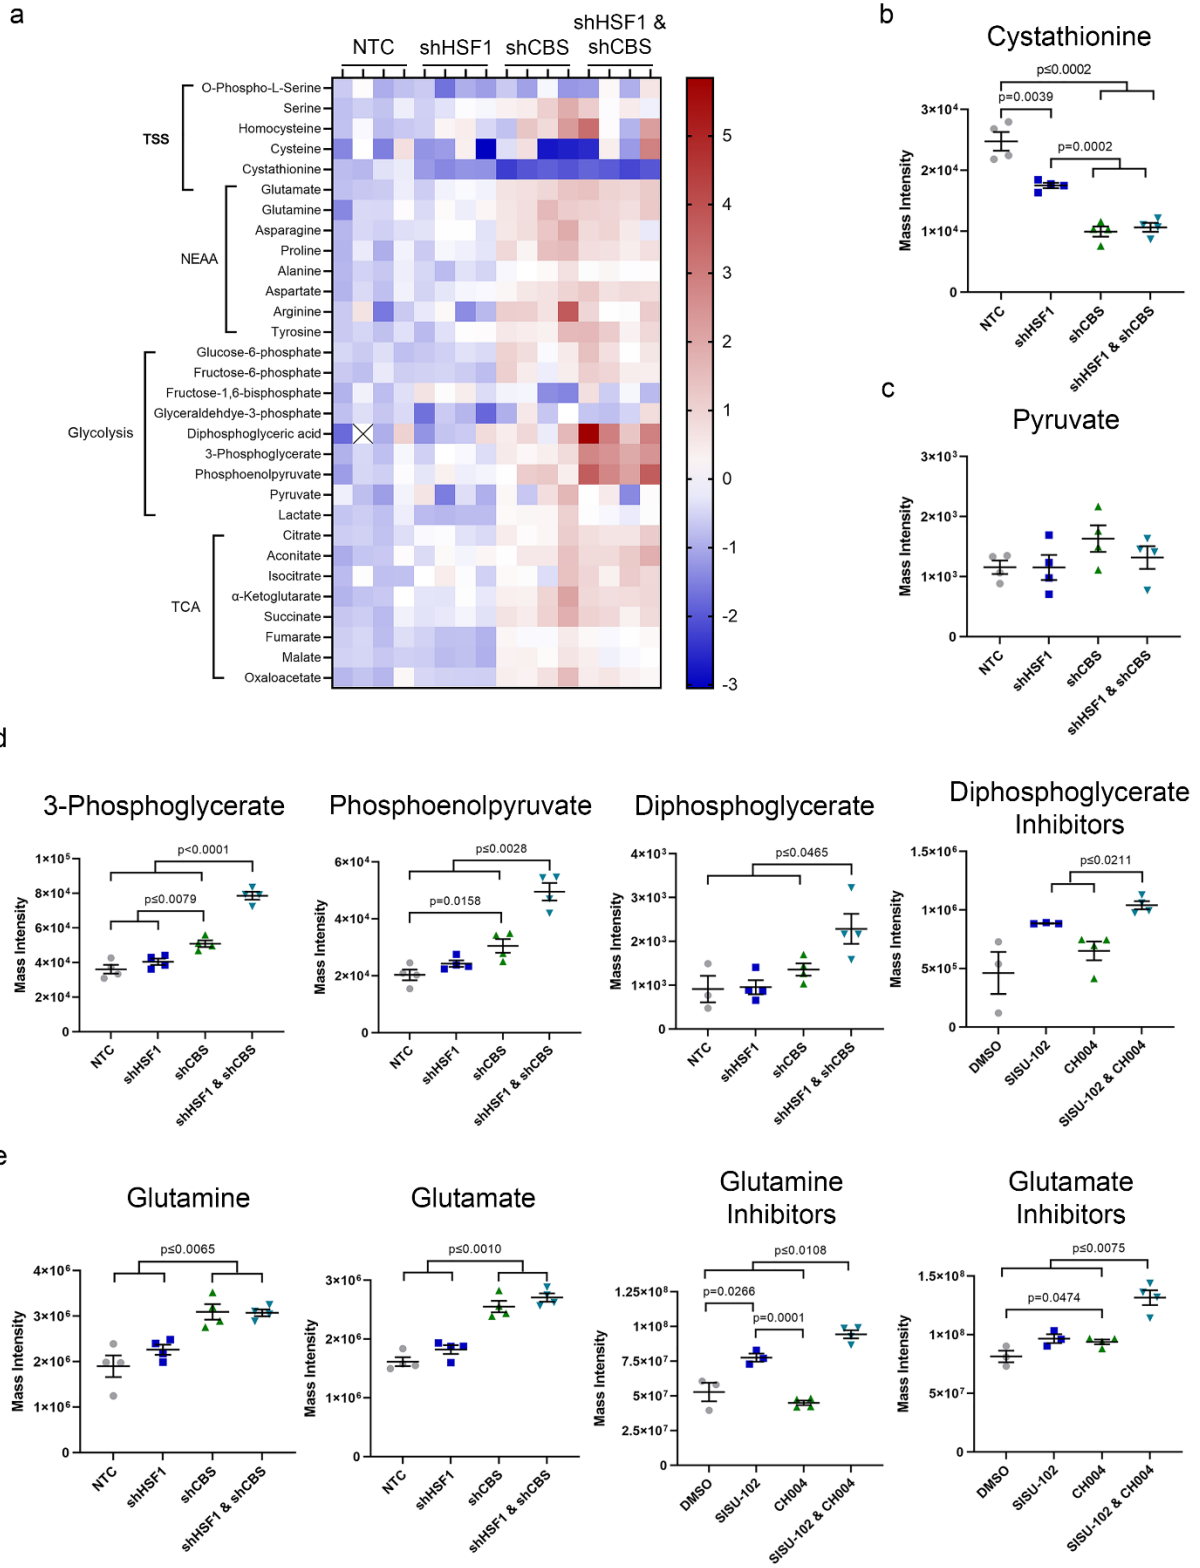

**Supplementary Figure 3** *HSF1* and *CBS* knockdown decrease cystathionine and increase precursors to pyruvate, glutamine, and glutamate levels. Transsulfuration metabolites were measured in *HSF1* and *CBS* knockdown C4-2 cells treated with 50 ng per mL doxycycline for 7

days. **(a)** Heat map of metabolites after *HSF1* and *CBS* knockdown in C4-2 cells (n=4). The X in the heat map indicates that one NTC replicate did not have a diphosphoglycerate level detected. **(b)** Cystathionine levels after *HSF1* and *CBS* knockdown. **(c)** Pyruvate levels after *HSF1* and *CBS* knockdown. **(d)** Levels of precursors to pyruvate from *HSF1* and *CBS* knockdown or in C4-2 cells treated with 2.5  $\mu$ M SISU-102 and 10  $\mu$ M CH004 for 48 hours. **(e)** Glutamine and glutamate levels after *HSF1* and *CBS* knockdown C4-2 cells treated and in C4-2 cells treated with 2.5  $\mu$ M SISU-102 and 10  $\mu$ M CH004 for 48 hours. Mean  $\pm$  standard error is displayed in dot plots. TSS: Transsulfuration pathway, NEAA: non-essential amino acids, and TCA: Tricarboxylic acid cycle.

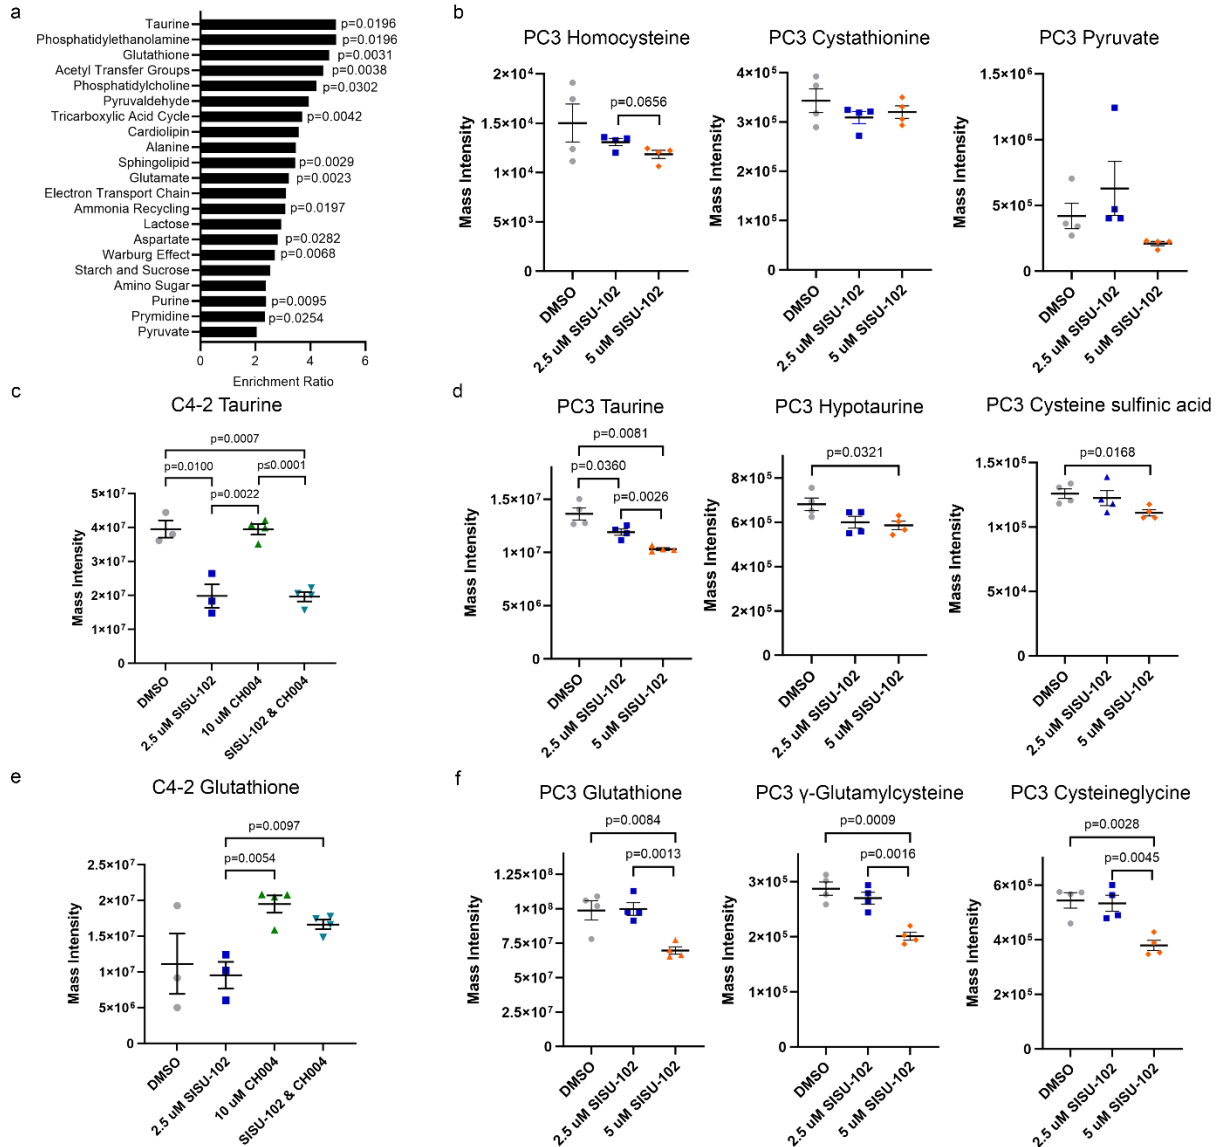

**Supplementary Figure 4 Transsulfuration pathway metabolites were unaffected by SISU-102 in PC3 cells, but taurine and glutathione metabolites were decreased.**

(a) Homocysteine degradation was not identified from enrichment analysis with MetaboAnalyst of 5  $\mu$ M SISU-102 treated of PC3 cells, but taurine and glutathione pathway metabolites were affected (n=4). (b) Transsulfuration pathway metabolites were unaffected by SISU-102 treated of PC3 cells (n=4). (c) C4-2 cells treated with 2.5  $\mu$ M SISU-102 had decreased levels of taurine (n=4, but 1 replicate was filtered from DMSO and SISU-102 groups due to high variance). (d) PC3 cells treated with 5  $\mu$ M SISU-102 had decreased levels of taurine metabolites (n=4). (e) Glutathione levels were unaffected in C4-2 cells treated with 2.5  $\mu$ M SISU-102 (n=4, but 1 replicate was filtered from DMSO and SISU-102 groups due to high variance). (f) Glutathione metabolites were decreased in PC3 cells treated with 5  $\mu$ M SISU-102 (n=4). Mean  $\pm$  standard error is displayed in dot plots.

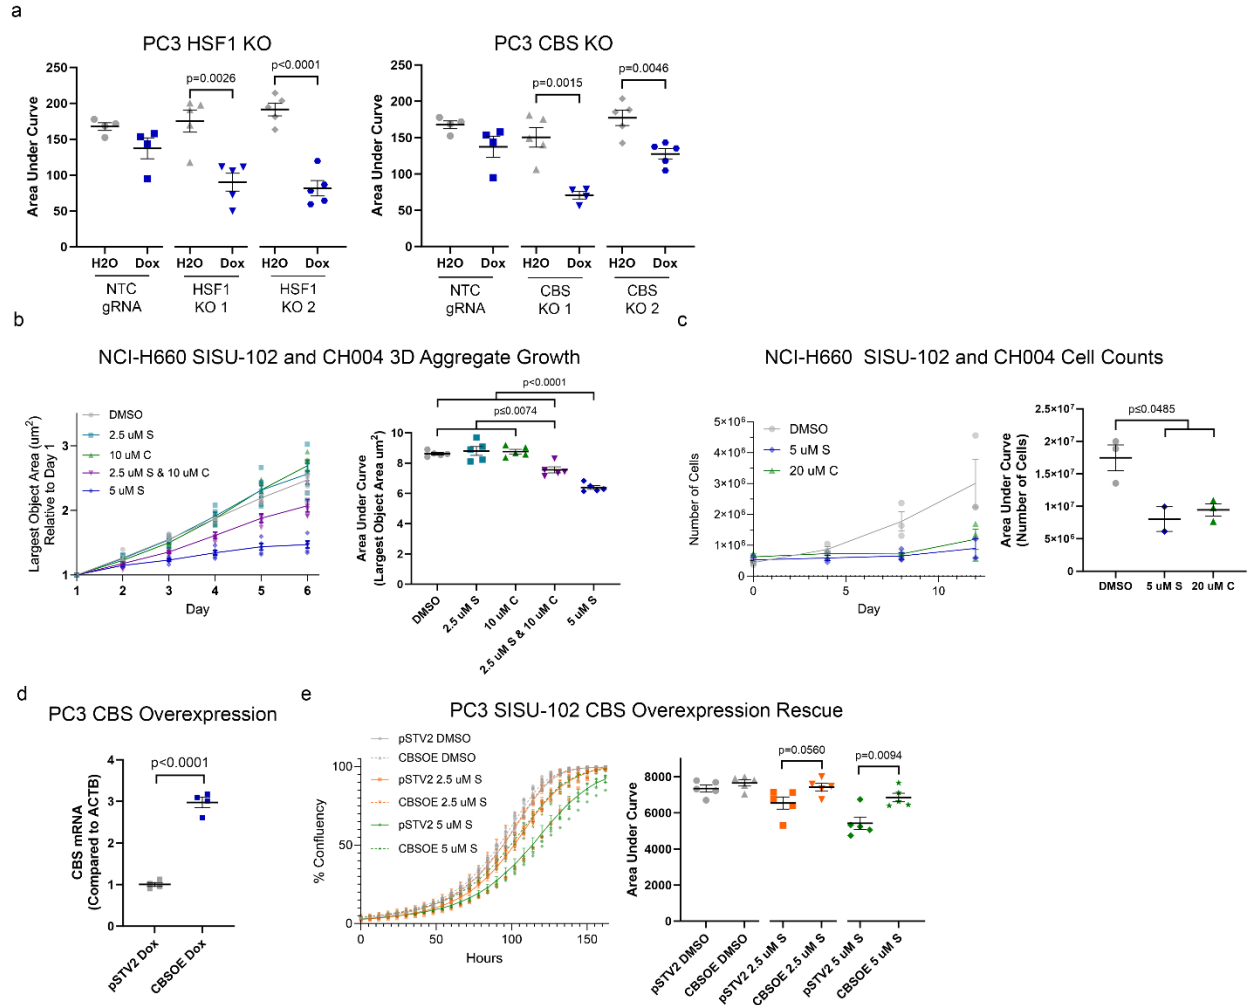

**Supplementary Figure 5 PCa growth is modified by HSF1 and CBS. (a)** There was a decrease in the growth in inducible Cas9 expressing PC3 cells treated with 2  $\mu$ g per mL doxycycline for 2 weeks before the IncuCyte growth curve when we targeted *HSF1* and *CBS* with guide RNAs (n=5). **(b)** An additive decrease in growth was observed for NCI-H660 cells treated with the HSF1 inhibitor SISU-102 and the CBS inhibitor CH004 in a 3D aggregate growth assay that analyzed for growth from the beginning of the experiment with area under the curve analysis (n=6). **(c)** There was a significant decrease in the growth of NCI-H660 cells treated with HSF1 inhibitor and a trend of a decrease in growth from the CBS inhibitor in a cell count assay (n=3). **(d)** *CBS* was overexpressed in PC3 cells, and *CBS* expression was induced with 250 ng per mL doxycycline treatment for 1 week before *CBS* mRNA levels were evaluated (n=4 technical replicates). **(e)** *CBS* overexpression in PC3 cells showed a rescue from 2.5 and 5  $\mu$ M SISU-102 treatment when pictures were taken every 6 hours in an IncuCyte growth curve (n=5) S: SISU-102 and C: CH004. Mean  $\pm$  standard error is displayed in dot plots and line graphs.



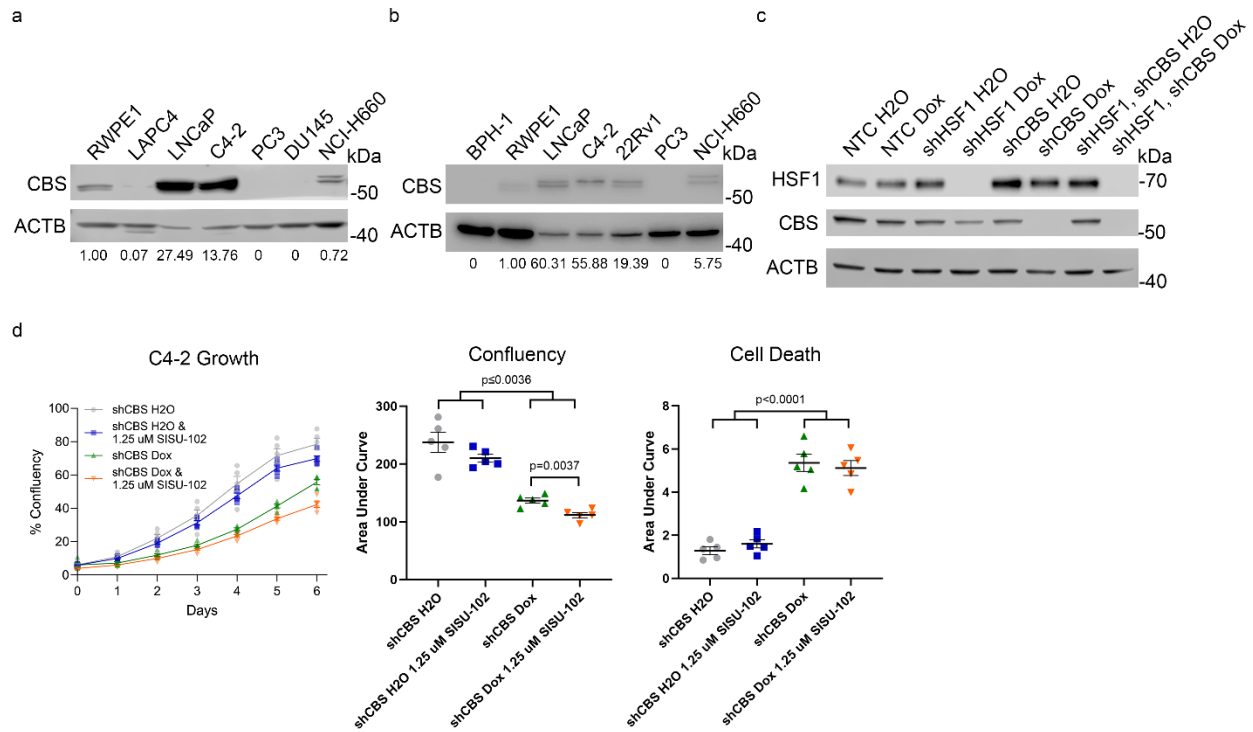

**Supplementary Figure 6 CBS levels in PCa lines, Validation of HSF1 and CBS knockdown in C4-2, and HSF1 inhibitor treatment is additive to CBS knockdown in C4-2.** (a, b) CBS protein levels were evaluated through western blot analysis with RWPE1 as a control. (c) C4-2 with shRNAs for *HSF1* and *CBS* were treated with 50 ng per mL doxycycline for one week. The level of HSF1 and CBS protein was evaluated through western blot analysis. (d) C4-2 cells with inducible CBS knockdown were treated for seven days with 50 ng per mL doxycycline. Then, the cells were plated into a growth curve with SISU-102 and doxycycline in the media (n=5). The growth was analyzed in an IncuCyte growth curve with area under the curve analysis of growth from the beginning of the experiment. Cell death was measured with Cytotox green with area under the curve analysis. Mean  $\pm$  standard error is displayed in line and dot plots.

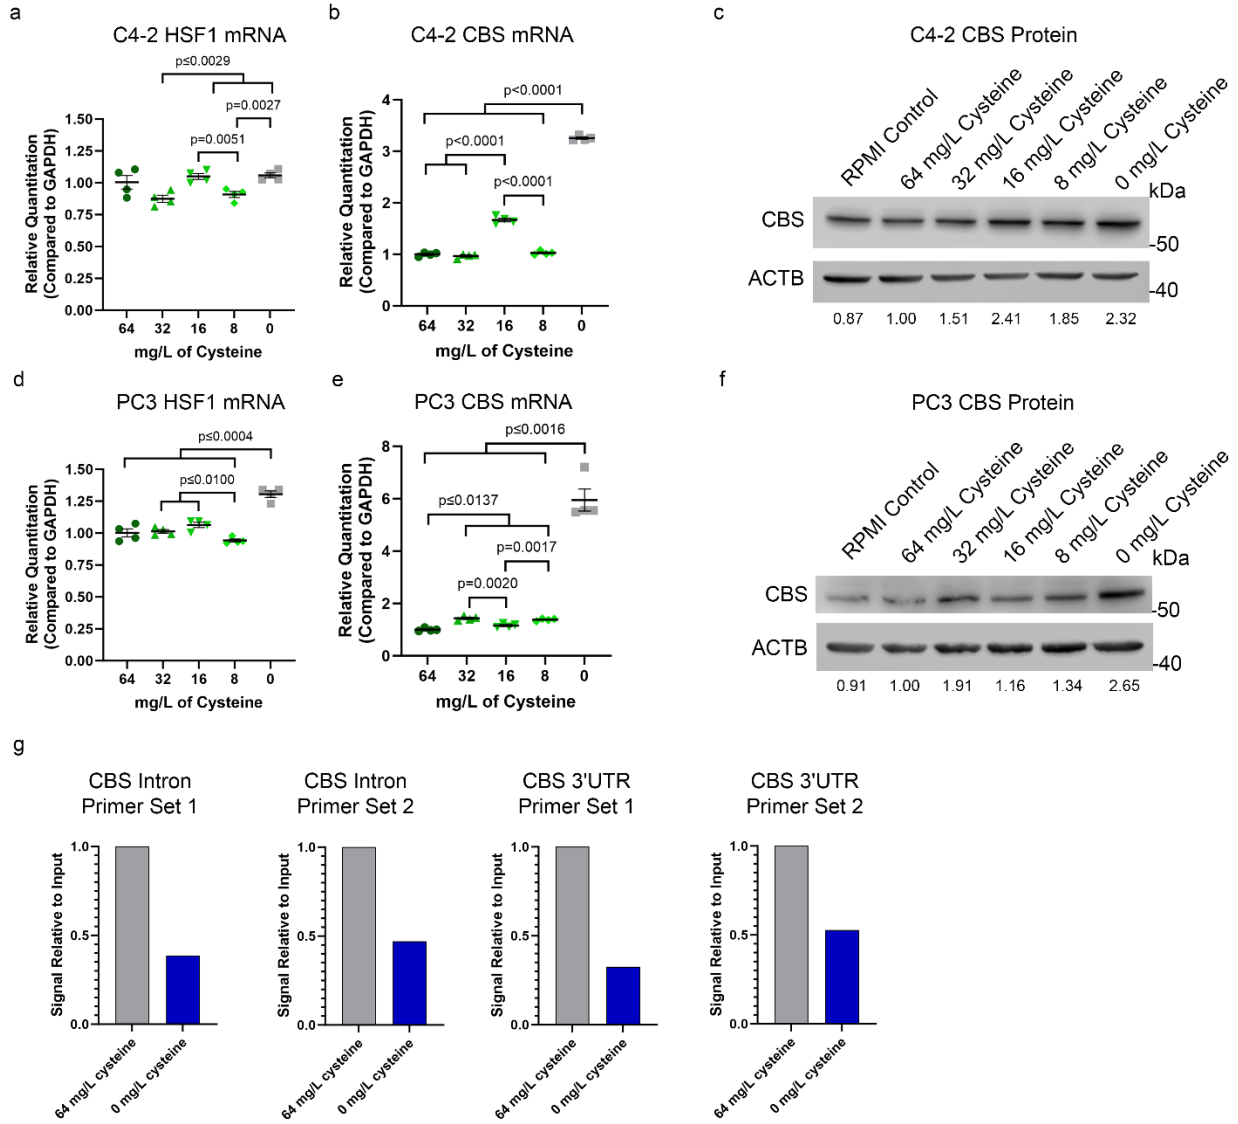

**Supplementary Figure 7 Acute cysteine deprivation increases CBS mRNA and protein levels independent of HSF1 binding to the CBS gene.** C4-2 and PC3 cells were deprived of cysteine for 48 hours before *HSF1* and *CBS* mRNA analysis (n=4 technical replicates) (**a**, **b** and **d**, **e**) and CBS protein analysis (**c** and **f**). The level of HSF1 binding to the 2 HSF1 binding sites on the *CBS* gene were and measured with CHIP-qPCR after 48 hours of cysteine deprivation (n=4) (**g**). Mean  $\pm$  standard error is displayed in the dot plots. The mean is only displayed in bar graphs for CHIP-qPCR experiments.

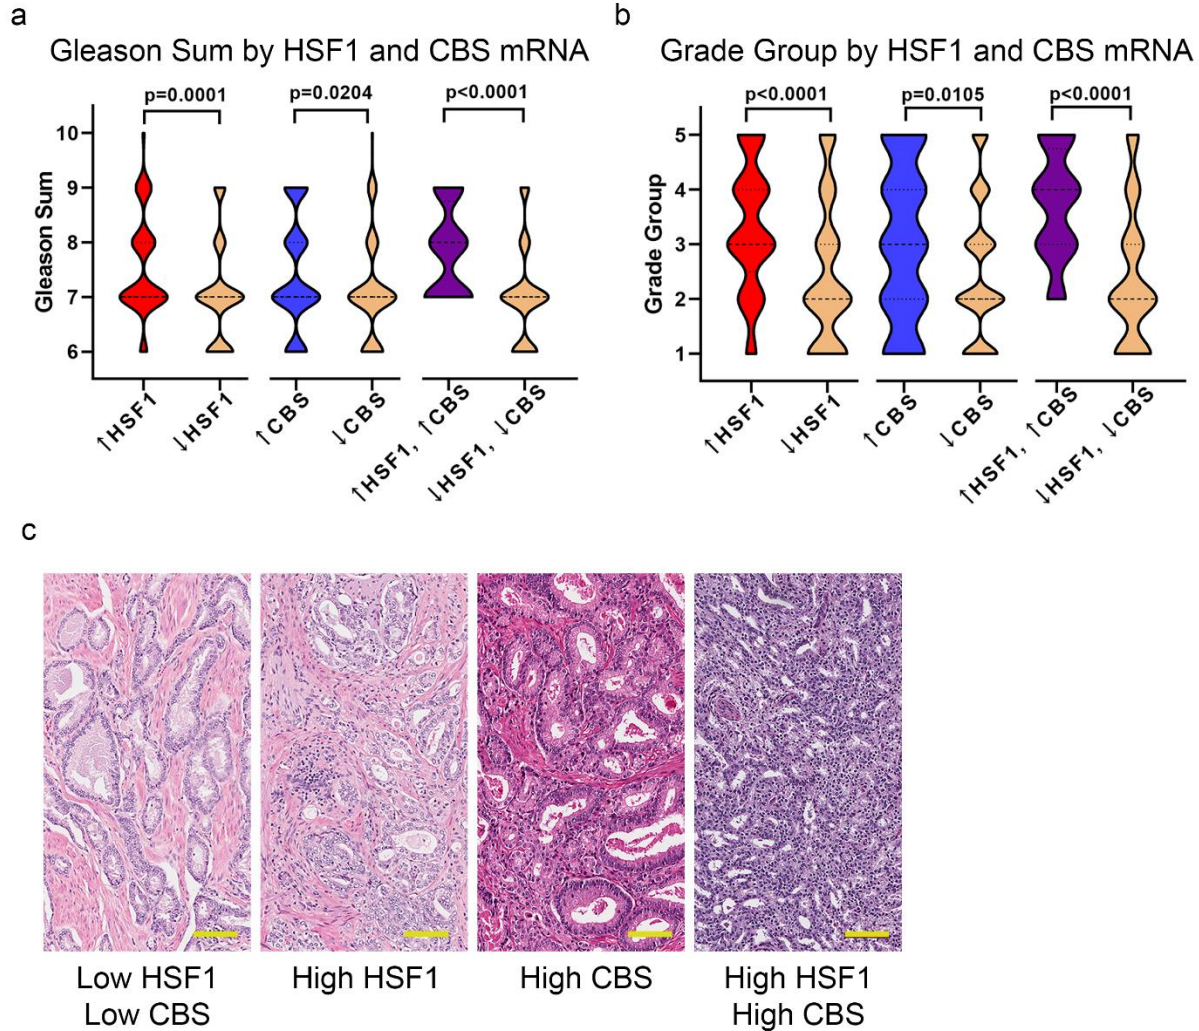

**Supplementary Figure 8 HSF1 and CBS predict Gleason score and Grade Group. A-C** The ability of *HSF1* and *CBS* mRNA to predict Gleason score and Grade Group was tested in the TCGA database (n=236). **(a)** Gleason score of highest *HSF1* quartile (n=61), highest *CBS* quartile (n=71), or highest *HSF1* and *CBS* quartiles (n=24) versus the corresponding group with the median shown as a dotted line. Groups were analyzed with a Mann-Whitney U test. **(b)** Grade Group of highest *HSF1* quartile (n=61), highest *CBS* quartile (n=71), or highest *HSF1* and *CBS* quartiles (n=24) versus the corresponding group with the median shown as a dotted line. **(c)** Representative hematoxylin and eosin images by *HSF1* and *CBS* group are shown. Scale bar= 100  $\mu$ m. Groups were analyzed with a Mann-Whitney U test. KO: knockout. Mean  $\pm$  standard error is displayed in line and bar graphs. Median is shown with the dashed line in the truncated violin plots for Gleason sum and Grade Group with the quartiles shown by the dotted line.

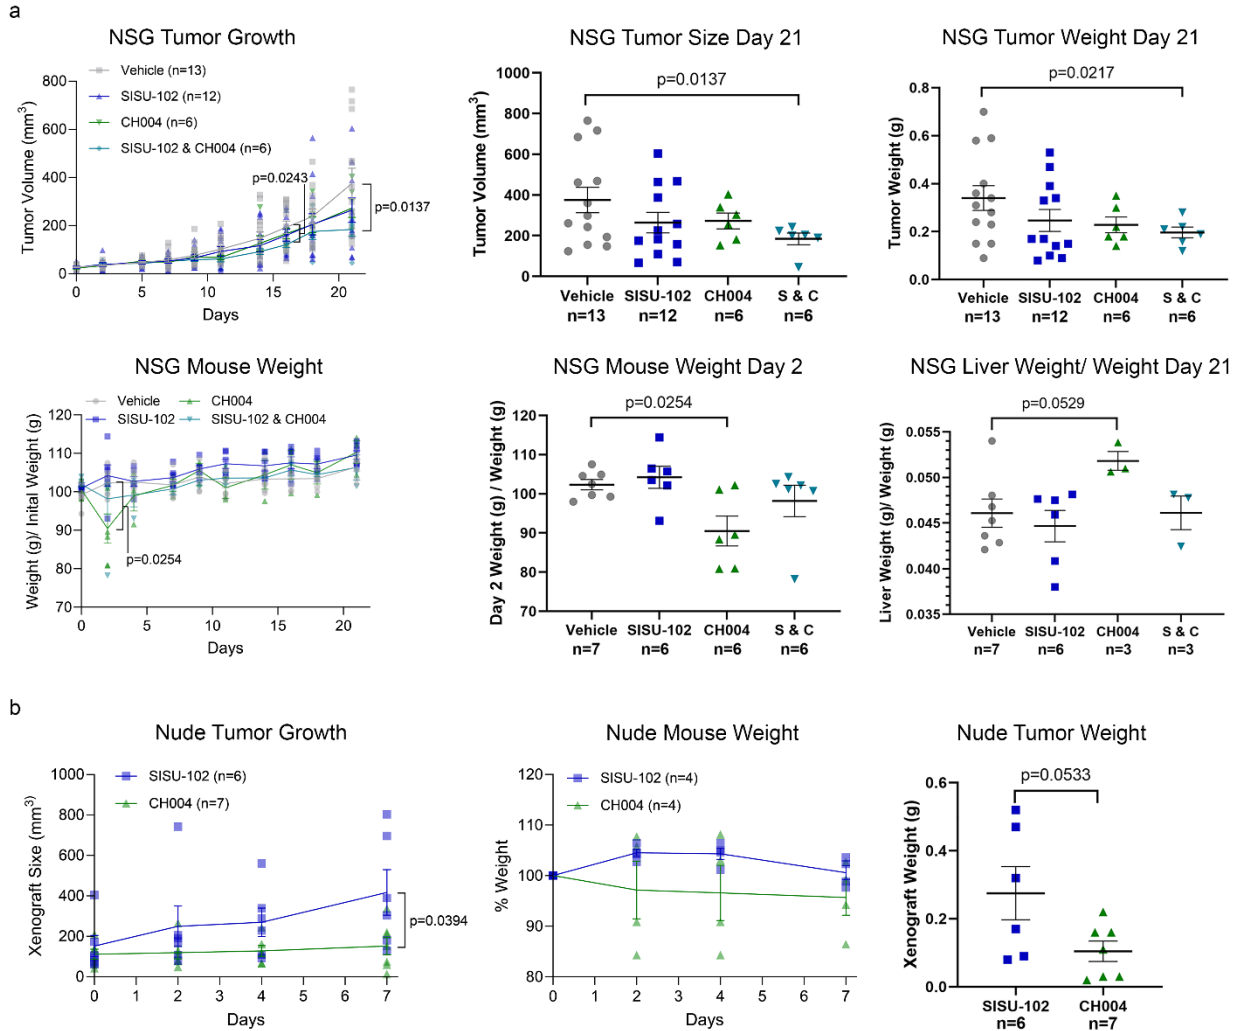

**Supplementary Figure 9 The CBS inhibitor CH004 decreases NCI-H660 growth in NSG and nude mice, but CH004 showed toxicity in the animals.** NSG mice were injected with 10 mg per kg CH004 in PBS via tail vein, a concentration that did not affect B6 mice after 4 treatments, on day 0 and day 2. Six out of the twelve the mice that were injected with CH004 succumbed to adverse events hours after the second injection, including mice that were also injected with 5 mg per kg SISU-102. However, the mice that fared well after the CH004 treatment and received SISU-102 had smaller tumor size and weight at 21 days (Vehicle n=13, SISU-102 n=12, CH004 n=6, SISU-102 & SISU-102 and CH004 n=6) **(a)**. There were no lesions seen in brain, lung, pancreas, kidney, heart, skeletal muscle, or liver from the CH004 treatment alone or in combination with SISU-102 (data not shown), but mice treated with only CH004 had a trend of an increased liver weight for their body weight. **(b)** We hypothesized that the less immunocompromised athymic nude mice would be less affected by CH004 than NSG mice. However, the nude mice bearing NCI-H660 tumors did not tolerate a single dose of 7.5 or 5 mg per kg CH004. The nude mice did tolerate a single dose of 2.5 mg per kg CH004, and these mice were compared to daily 5 mg per kg SISU-102 in nude mice bearing NCI-H660 xenografts. The single treatment of CH004 decreased NCI-H660 xenograft size in nude mice (SISU-102 n=6, CH004 n=7) and had a trend of decreasing tumor weight while having a modest non-significant decrease on mouse weight (n=4). Mean  $\pm$  standard error is displayed in line graphs and dot plots.

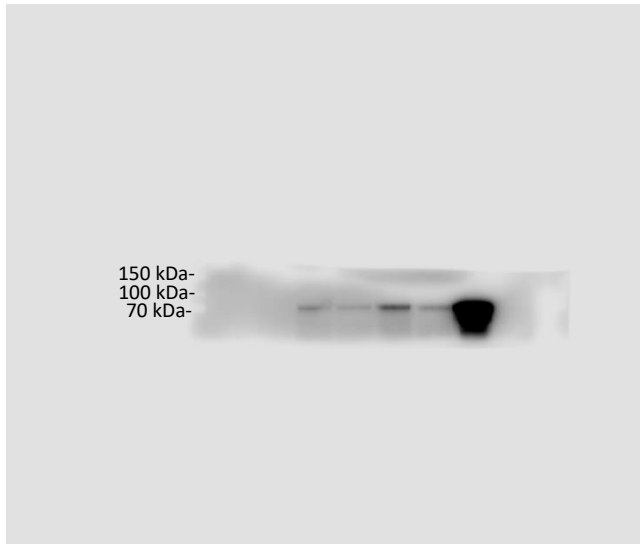

HSF1 in parental prostate cancer cells from Figure 1

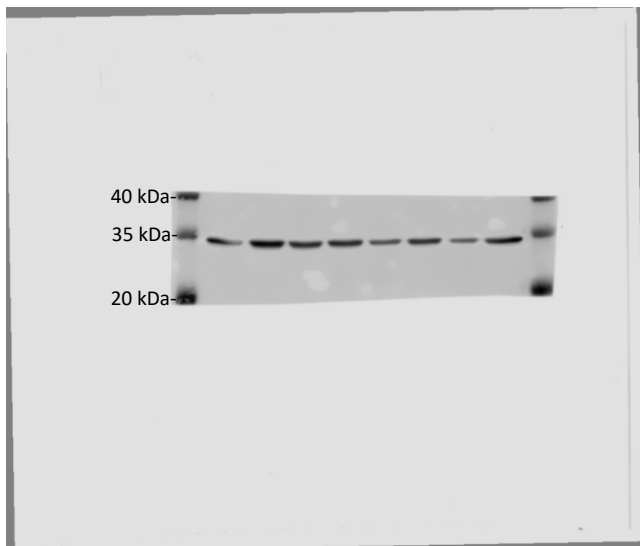

GAPDH in parental prostate cancer cells from Figure 1

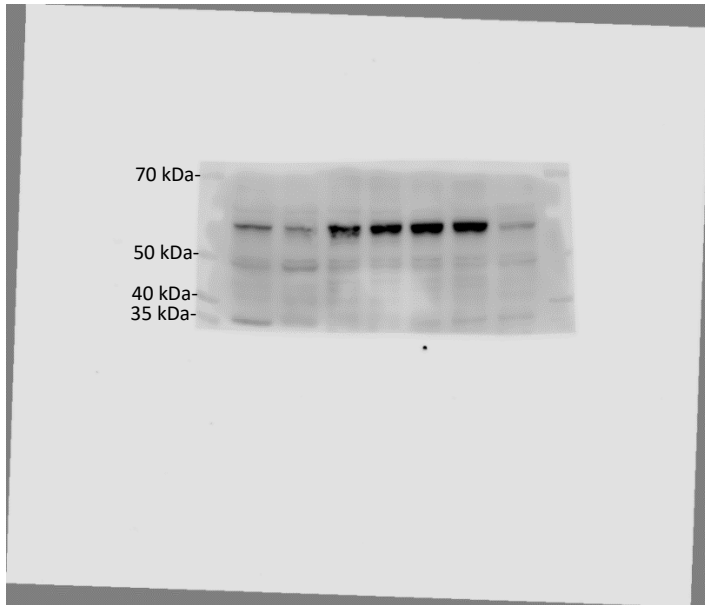

CBS in prostate cancer lines from Figure 3

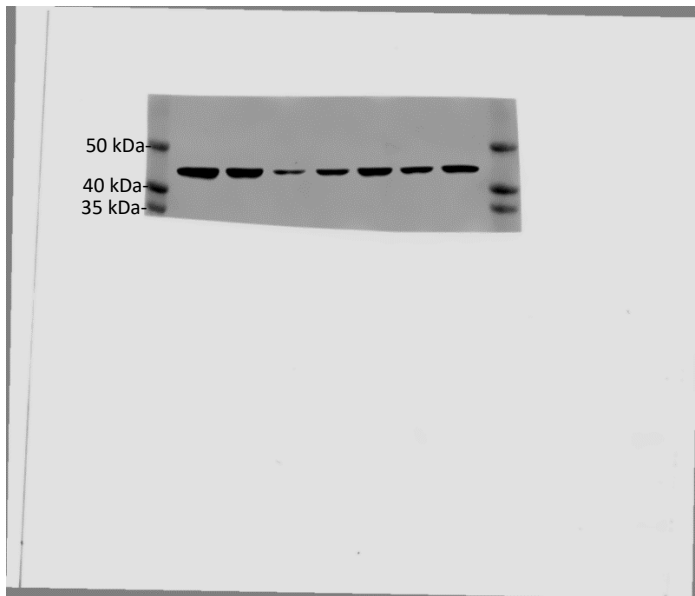

ACTB in prostate cancer lines from Figure 3

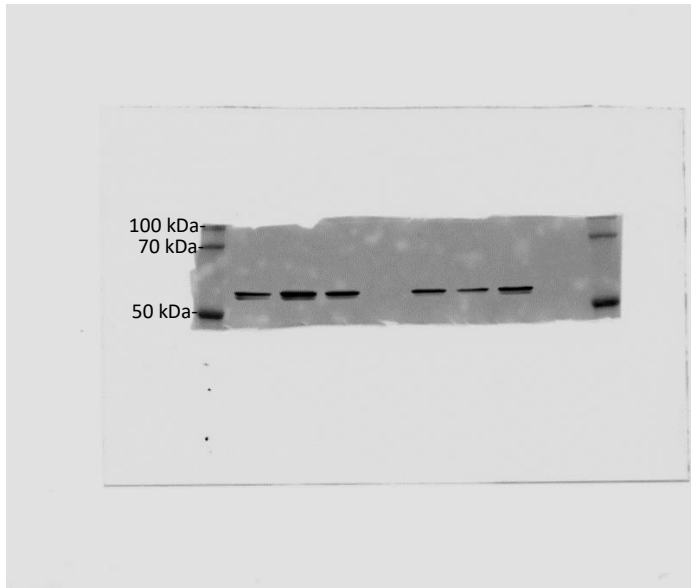

CBS after induction of CBS knockdown from Figure 3 (the other 4 wells were from another inducible CBS shRNA)

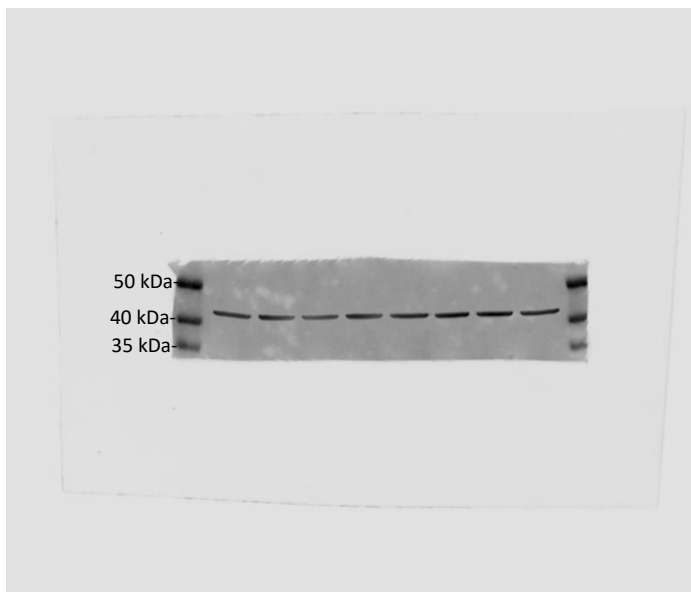

ACTB after induction of CBS knockdown from Figure 3 (the other 4 wells were from another inducible CBS shRNA)

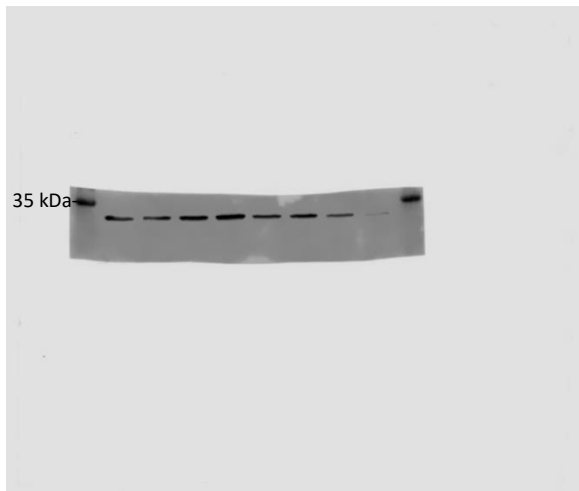

Full length caspase 3 after NCI-H660 was treated with SISU-102 and CH004 from Figure 5

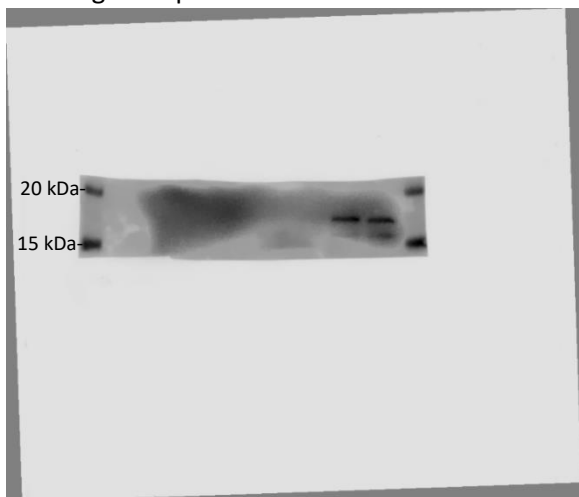

Cleaved caspase 3 after NCI-H660 was treated with SISU-102 and CH004 from Figure 5

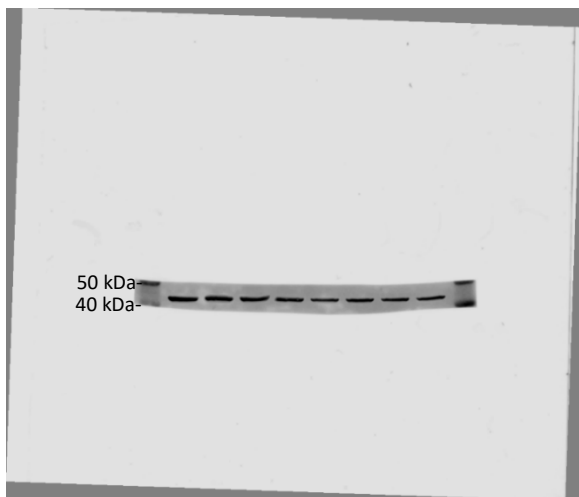

ACTB after NCI-H660 was treated with SISU-102 and CH004 from Figure 5



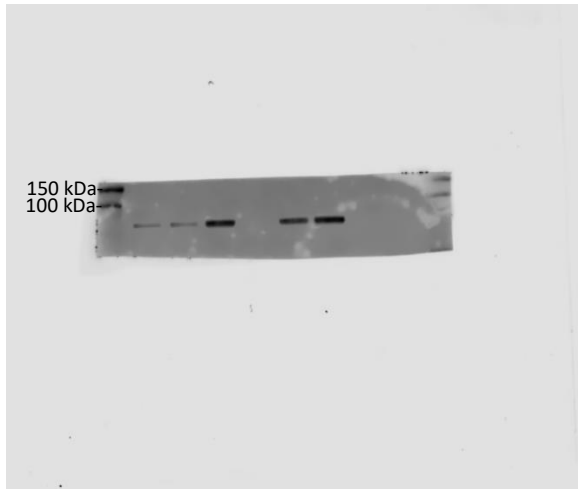

HSF1 after HSF1 knockdown in C4-2 from Figure 6 Lanes 4 and 5 shown in the figure

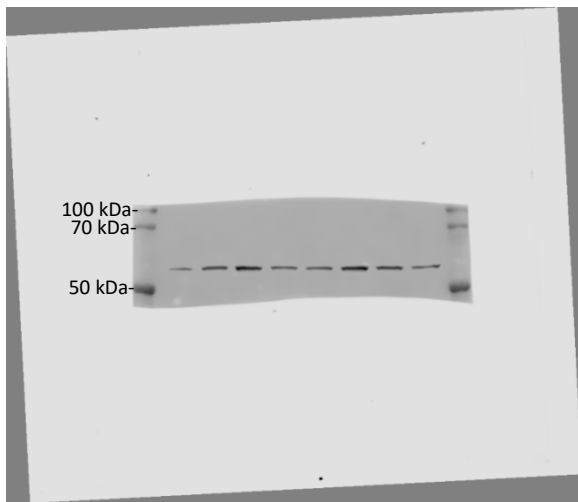

CBS after HSF1 knockdown in C4-2 from Figure 6 Lanes 4 and 5 shown in the figure

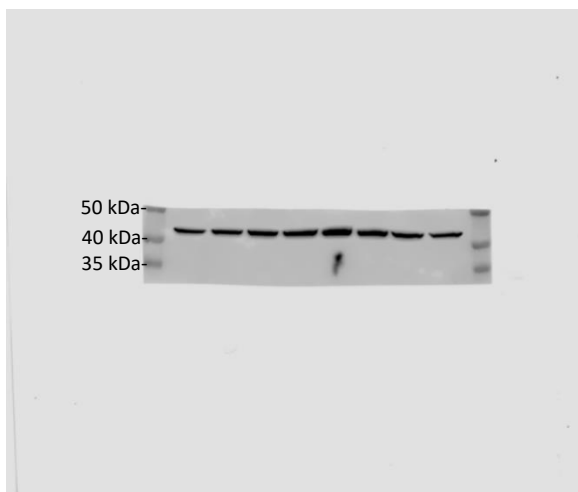

ACTB after HSF1 knockdown in C4-2 from Figure 6 Lanes 4 and 5 shown in the figure

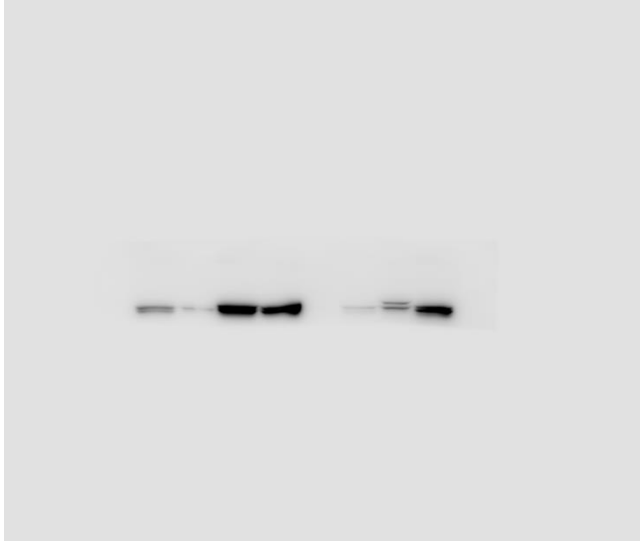

CBS in Prostate Cancer Lines from Supplementary Figure 6a without ladder overlay (Small Cell Neuroendocrine Prostate Cancer cell line MSKCC-EF1 in lane 9 had very high levels of CBS protein, but was not evaluated in the paper)

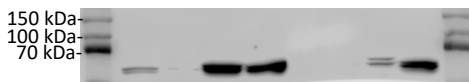

CBS in Prostate Cancer Lines from Supplementary Figure 6a with ladder overlay that was cropped to just have the membrane in the image (Small Cell Neuroendocrine Prostate Cancer cell line MSKCC-EF1 in lane 9 had very high levels of CBS protein, but was not evaluated in the paper)

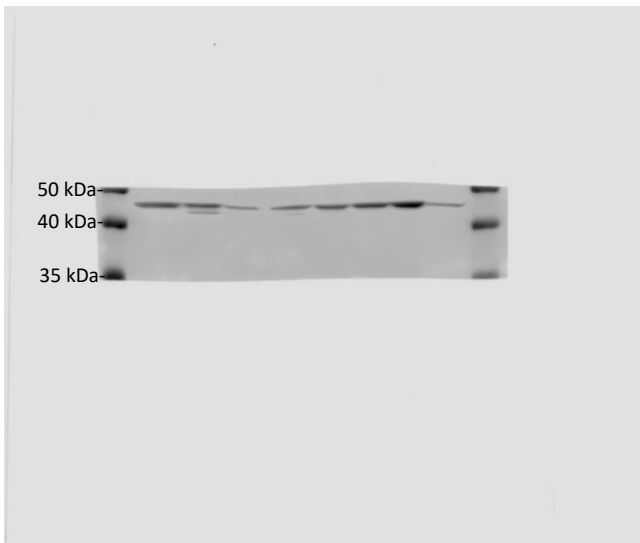

ACTB in Prostate Cancer Lines from Supplementary Figure 6a (Small Cell Neuroendocrine Prostate Cancer cell line MSKCC-EF1 in lane 9 had very high levels of CBS protein, but was not evaluated in the paper)

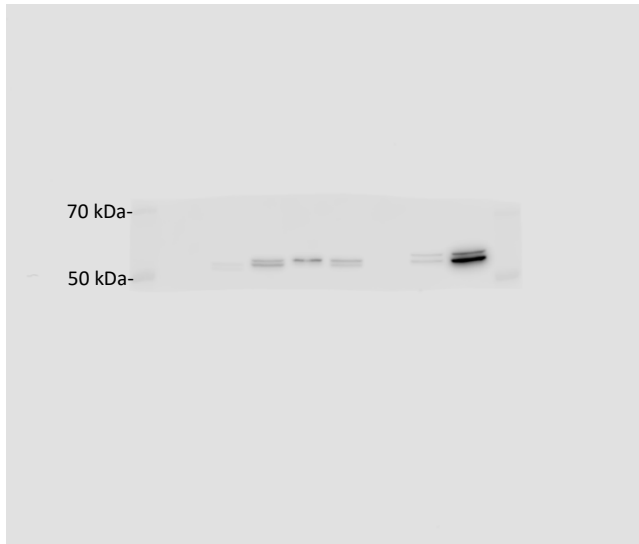

CBS in Prostate Cancer Lines from Supplementary Figure 6b (Small Cell Neuroendocrine Prostate Cancer cell line MSKCC-EF1 in lane 9 had very high levels of CBS protein, but was not evaluated in the paper)

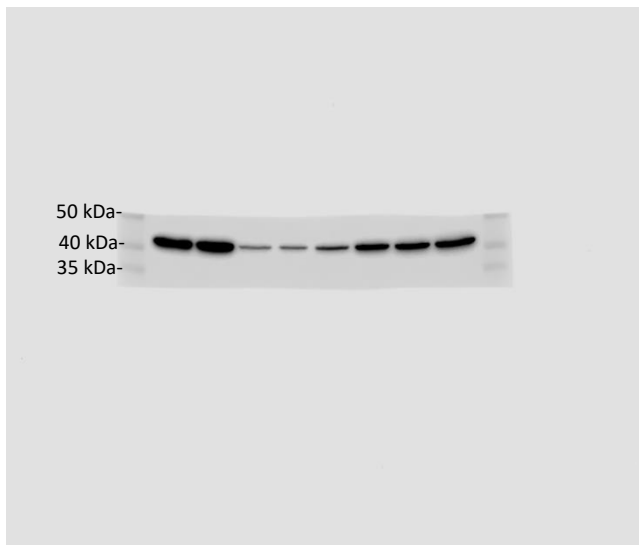

ACTB in Prostate Cancer Lines from Supplementary Figure 6b (Small Cell Neuroendocrine Prostate Cancer cell line MSKCC-EF1 in lane 9 had very high levels of CBS protein, but was not evaluated in the paper)

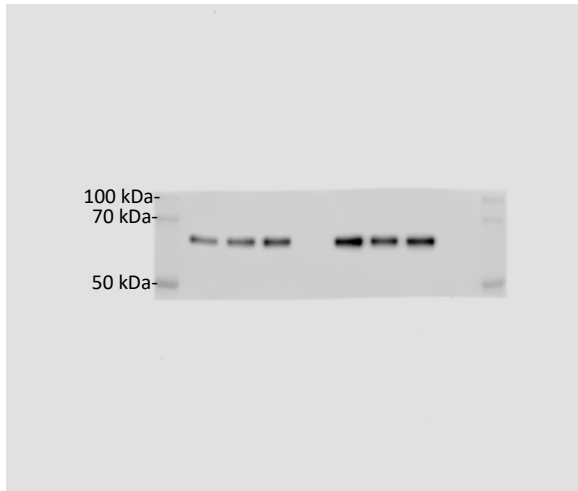

HSF1 C4-2 HSF1 and CBS inducible knockout from Supplementary Figure 6c

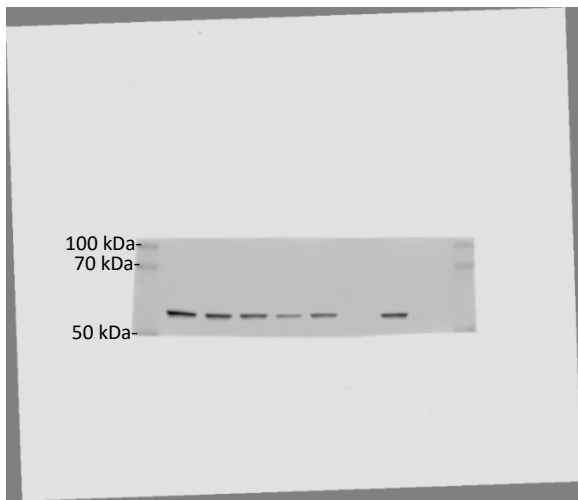

CBS C4-2 HSF1 and CBS inducible knockout from Supplementary Figure 6c

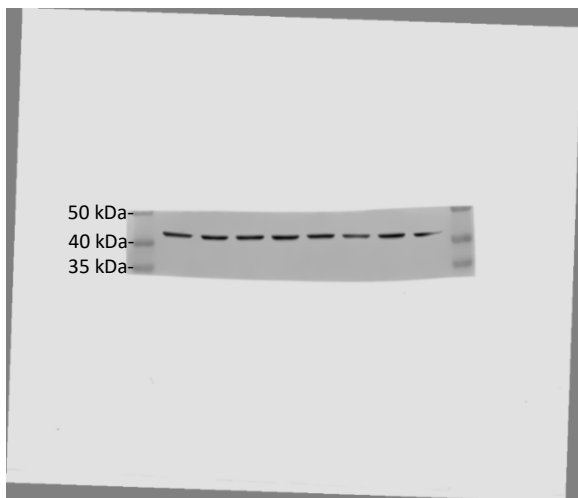

ACTB C4-2 HSF1 and CBS inducible knockout from Supplementary Figure 6c

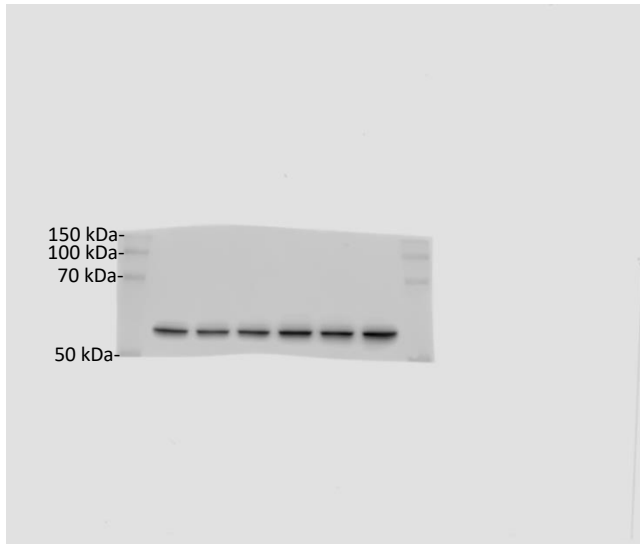

CBS C4-2 with 48 hours of cysteine deprivation from Supplementary Figure 7c

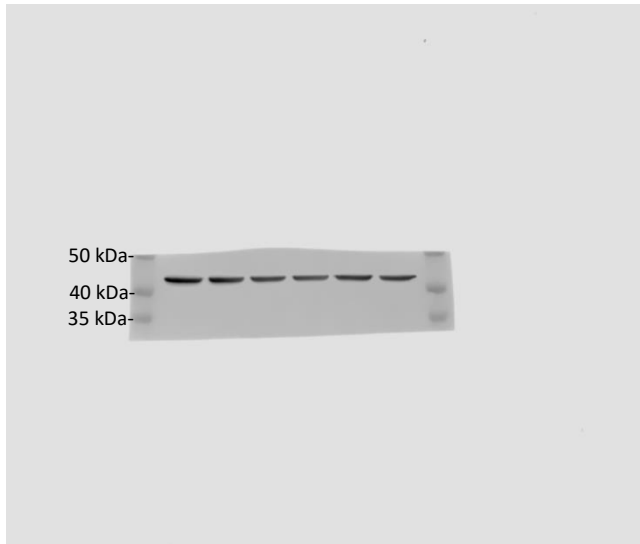

ACTB C4-2 with 48 hours of cysteine deprivation from Supplementary Figure 7c

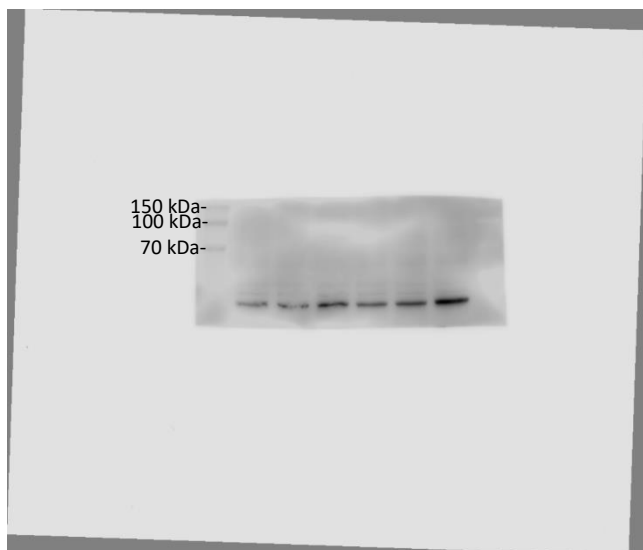

CBS PC3 with 48 hours of cysteine deprivation from Supplementary Figure 7f

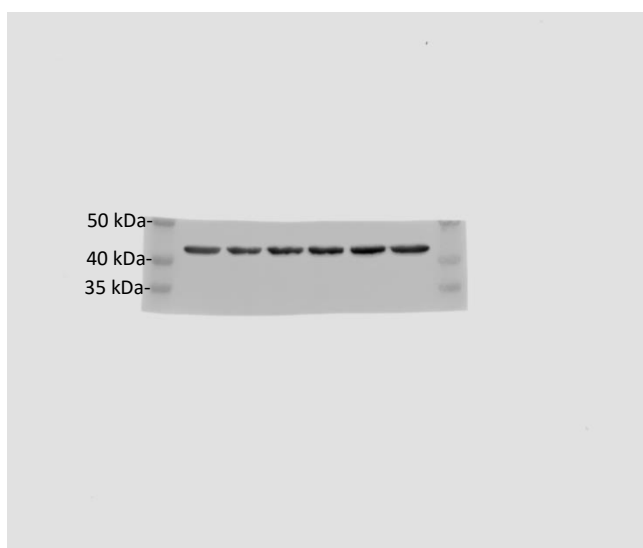

ACTB with 48 hours of cysteine deprivation from Supplementary Figure 7f

**Supplementary Figure 10 Unedited Western Blots** Western blot membranes were developed by Chemiluminescent Substrate (Thermo Fisher) for HRP conjugated antibody detection and exposed by Odyssey Imaging Systems (LI-COR). Overlay with the 700 nm channel was done to visualize the protein ladder for all unedited blots except the blot evaluating CBS in Prostate Cancer Lines from Supplementary Figure 6a. However, an image with the 700 nm overlay that was cropped to just have the membrane in the image is provided for comparison.
