# Supplementary material for: Heat shock factor 1 directly regulates transsulfuration pathway to promote prostate cancer proliferation and survival
Source: PubMed Central journal article supplement (PMC10764307; doi:10.1038/s42003-023-05727-9), 2024-01-03
Supplement: 42003_2023_5727_MOESM3_ESM.pdf [file 42003_2023_5727_MOESM3_ESM.pdf]

## **Description of Additional Supplementary Files**

**File name:** Supplementary Data

**Description:** The source data behind the graphs in the paper.
